# Supplementary material for: Cannabidiol (CBD) as a Promising Anti-Cancer Drug
Source: PubMed Central journal article supplement (PMC7693730; doi:10.3390/cancers12113203), 2020-10-30
Supplement: cancers-12-03203-s001.pdf [file cancers-12-03203-s001.pdf]

# Supplementary Material: Cannabidiol (CBD) as a Promising Anti-cancer Drug

Emily S. Seltzer, Andrea K. Watters, Danny MacKenzie, Lauren M. Granat and Dong Zhang

Table S1. CBD's effect on Gliomas.

| Paper                       | Glioma cell line         | IC <sub>50</sub> (μM)                                                      | Effect on cancer cells                                                                                                                | Mechanism of action                                                                                                                                                              | Tested in cell line? | Tested in mouse model? |
|-----------------------------|--------------------------|----------------------------------------------------------------------------|---------------------------------------------------------------------------------------------------------------------------------------|----------------------------------------------------------------------------------------------------------------------------------------------------------------------------------|----------------------|------------------------|
| Jacobsson et al. (2000) [1] | C6                       | ND*                                                                        | Enhances Tamoxifen's anti-proliferative effect                                                                                        | N.D.                                                                                                                                                                             | Yes                  | No                     |
| Massi et al. (2003) [2]     | U87<br>U373              | 26.2 ± 2.8<br>24.1 ± 2.16*                                                 | Anti-proliferative<br>Apoptosis<br>Decreases tumor size                                                                               | Partially through CB <sub>2</sub><br>Independent of CB <sub>1</sub><br>and vanilloid receptor<br>Independent of Gi/Go-coupled receptor mechanism<br>Induces oxidative stress     | Yes                  | Yes                    |
| Vaccani et al. (2005) [3]   | U87                      | 5.5 ± 1.1<br>(Cell migration)                                              | Inhibits cell migration                                                                                                               | Independent of cannabinoid, vanilloid receptors and TRPVs<br>Independent of Gi/o-coupled receptors                                                                               | Yes                  | No                     |
| Massi et al. (2006) [4]     | U87<br>Normal glial cell | ND<br>(Concentration that was inhibitory: 25 μM vs non-inhibitory: 10 μM)* | Anti-proliferative<br>Apoptosis                                                                                                       | Intrinsic and extrinsic caspase-dependent<br>Increases ROS and reduces glutathione                                                                                               | Yes                  | No                     |
| Ligresti et al. (2006) [5]  | C6                       | 8.5 ± 0.8**                                                                | Anti-proliferative<br>Apoptosis                                                                                                       | Independent of cell cycle arrest<br>Independent of CB <sub>1</sub> , CB <sub>2</sub> and TRPV1<br>Enhances FAAH degradation<br>Reduces AEA and AEA-binding cannabinoid receptors | Yes                  | No                     |
| Massi et al. (2008) [6]     | U87                      | ND*                                                                        | Anti-tumor growth                                                                                                                     | Decreases 5-LOX activity and levels<br>Independent of COX-2<br>Induces ROS (alone and with Δ <sup>9</sup> -THC)                                                                  | Yes                  | Yes                    |
| Marcu et al. (2010) [7]     | SF126<br>U251<br>U87     | 1.2 (1.1-1.3)<br>0.6 (0.5-1.0)<br>0.6 (0.5-0.7)*                           | Anti-proliferative (alone and synergistically with Δ <sup>9</sup> -THC)<br>Synergistically with Δ <sup>9</sup> -THC:<br>Anti-invasive | Synergistically with Δ <sup>9</sup> -THC:<br>Downregulation of phosphorylation of p42/44 MAPK                                                                                    | Yes                  | No                     |

|                               |                        |                                                       |  |                                                                   |                                                                                 |     |     |
|-------------------------------|------------------------|-------------------------------------------------------|--|-------------------------------------------------------------------|---------------------------------------------------------------------------------|-----|-----|
|                               |                        |                                                       |  | Apoptosis<br>Inhibits cell cycle                                  | Partial dependence on<br>CB <sub>2</sub> receptor                               |     |     |
| Torres et al. (2011) [8]      | U87MG                  |                                                       |  |                                                                   |                                                                                 |     |     |
|                               | A172                   |                                                       |  |                                                                   |                                                                                 |     |     |
|                               | SW1783                 | 1.49                                                  |  | Antiproliferative                                                 | Independent of CB <sub>1</sub> ,<br>CB <sub>2</sub> , ceramide                  | Yes | Yes |
|                               | U372                   |                                                       |  | Apoptosis                                                         | biosynthesis, and                                                               |     |     |
|                               | T98                    |                                                       |  | Reduces tumor growth                                              | autophagy                                                                       |     |     |
|                               | SW1088                 |                                                       |  | (Allows for lower dose of Δ <sup>9</sup> -THC)                    | Induces ROS                                                                     |     |     |
| Nabissi et al. (2013) [9]     | LN405                  | 1.49                                                  |  |                                                                   |                                                                                 |     |     |
|                               | HG19                   | *                                                     |  |                                                                   |                                                                                 |     |     |
|                               | HG2                    |                                                       |  |                                                                   |                                                                                 |     |     |
|                               | HG14                   |                                                       |  |                                                                   |                                                                                 |     |     |
|                               | U87MG                  | 30.2                                                  |  | Antiproliferative                                                 | Acts as a selective TRPV2 agonist, enhancing calcium influx                     | Yes | No  |
|                               | MZC                    | 33.2*                                                 |  | Apoptosis (at >10 μM)                                             | (specifically, at the pore region of the TRP channels)                          |     |     |
| Solinas et al. (2013) [10]    |                        |                                                       |  | Potentiates cytotoxic effect of chemotherapies (BCNU, TMZ, DOXO)  | Increases expression of TRPV2                                                   |     |     |
|                               |                        |                                                       |  |                                                                   | U87-MG: inhibits of MMP-9, TIMP-1, TIMP-4, uPA, SerpinE1-PAI-1 and VEGF         |     |     |
|                               | U87MG                  | 11.16 (10.94-11.38)                                   |  | Decreases cell invasion                                           | T98G: inhibits MMP-9, TIMP-4, SerpinE1-PAI-1, VEGF, TGF-β1, CXCL-16 and PDGF-AA | Yes | No  |
|                               | T98G                   | 13.41 (13.09-13.86)*                                  |  | Antiproliferative                                                 | Downregulates ERK and PI3K/Akt pathway                                          |     |     |
|                               |                        |                                                       |  |                                                                   | Inhibits HIF-1α in U87-MG cells                                                 |     |     |
|                               |                        |                                                       |  |                                                                   |                                                                                 |     |     |
| De La Ossa et al. (2013) [11] | U87MG                  | ND (Used Cannabinoid-loaded MPs)                      |  | Decrease tumor growth and weight                                  | Decreases tumor vascularization                                                 | No  | Yes |
|                               |                        |                                                       |  | Apoptosis                                                         |                                                                                 |     |     |
|                               |                        |                                                       |  | Antiproliferative                                                 |                                                                                 |     |     |
|                               | T98G                   | 24 h: 10 ± 2.1<br>48 h: 8.4 ± 2.9<br>72 h: 5.2 ± 1.3  |  | Reduction in tumor size                                           |                                                                                 |     |     |
|                               |                        |                                                       |  | (Alone and combined with ionized radiation + Δ <sup>9</sup> -THC) | Modulates phosphorylation of p42/44 MAPK                                        | Yes | Yes |
|                               |                        |                                                       |  |                                                                   | Reduces pAKT                                                                    |     |     |
| Scott et al. (2014) [12]      | U87MG                  | 24 h: 12 ± 3.4<br>48 h: 14 ± 7.1<br>72 h: 9.7 ± 1.3   |  | Apoptosis (mild) (cytotoxic and cytostatic)                       |                                                                                 |     |     |
|                               |                        |                                                       |  |                                                                   |                                                                                 |     |     |
|                               |                        |                                                       |  |                                                                   |                                                                                 |     |     |
|                               | GL261                  | 24 h: 11 ± 1.0<br>48 h: 11 ± 4.2<br>72 h: 10 ± 3.9*** |  |                                                                   |                                                                                 |     |     |
|                               |                        |                                                       |  |                                                                   |                                                                                 |     |     |
|                               |                        |                                                       |  |                                                                   |                                                                                 |     |     |
| Nabissi et al. (2015) [13]    | Glioma stem-like cells |                                                       |  | Antiproliferative                                                 | Independent of CB <sub>1</sub> , CB <sub>2</sub> and TRPV1                      |     |     |
|                               | #1                     | 19.4                                                  |  | Autophagy                                                         | Dependent on TRPV2                                                              |     |     |
|                               | #30                    | 14.6                                                  |  | Induces glioblastoma stem cell differentiation                    | Upregulates PTEN, reduces AKT activity                                          | Yes | No  |
|                               | #83                    | 19.3*                                                 |  | Increases                                                         | Increase Aml-1 transcription                                                    |     |     |
|                               |                        |                                                       |  |                                                                   |                                                                                 |     |     |
|                               |                        |                                                       |  |                                                                   |                                                                                 |     |     |

|                                 |                                                                |                                                                                      |  |                                                                                                                                                                                                                            |                                                                                                                                                                     |     |     |
|---------------------------------|----------------------------------------------------------------|--------------------------------------------------------------------------------------|--|----------------------------------------------------------------------------------------------------------------------------------------------------------------------------------------------------------------------------|---------------------------------------------------------------------------------------------------------------------------------------------------------------------|-----|-----|
|                                 |                                                                |                                                                                      |  | sensitivity to carmustine treatment via apoptosis                                                                                                                                                                          |                                                                                                                                                                     |     |     |
| Scott et al. (2015) [14]        | T98G<br>U87MG                                                  | 11 ± 2.7<br>17 ± 1.3<br>*                                                            |  | Antiproliferative                                                                                                                                                                                                          | Upregulates heat shock protein which allows for an increase in ROS<br>However, heat shock proteins dampen cytotoxic effects                                         | Yes | No  |
|                                 | T98G                                                           | 5.08 proliferation                                                                   |  | Antiproliferative                                                                                                                                                                                                          |                                                                                                                                                                     |     |     |
|                                 | U251                                                           | 6.75 viability                                                                       |  | Cell killing                                                                                                                                                                                                               |                                                                                                                                                                     |     |     |
|                                 | U87MG                                                          | 8.54 proliferation                                                                   |  | With DNA damaging agents:                                                                                                                                                                                                  |                                                                                                                                                                     |     |     |
| Deng et al. (2017) [15]         | Mouse: PDGF-GBM                                                | 9.21 viability<br>6.59 proliferation<br>5.13 viability                               |  | Synergistic antiproliferative and cell-killing responses                                                                                                                                                                   | Cooperative/allosteric mechanism of action                                                                                                                          | Yes | No  |
|                                 | Neural progenitor cells (for CNS toxicity)                     | 3.14 proliferation<br>4.98 viability<br>3.07 proliferation<br>3.19 viability<br>**** |  | In some lines, antagonistic responses at low concentrations                                                                                                                                                                |                                                                                                                                                                     |     |     |
| Ivanov et al. (2017) [16]       | U87MG<br>U118MG<br>T98G                                        | ND                                                                                   |  | Apoptosis (CBD alone and CBD with $\gamma$ -irradiation)                                                                                                                                                                   | Upregulates active JNK1/2 and MAPK p38<br>Downregulates active phosphorylation of p42/44 MAPK and AKT1 levels<br>Upregulates TNF/TNFR1 and TRAIL/TRAIL-R2 signaling | Yes | No  |
| López-Valero et al. (2018) [17] | U87MG<br>Glioma initiating cells:<br>GH2 GICs<br>12012<br>GICs | ND                                                                                   |  | CBD + $\Delta^9$ -THC ± TMZ:<br>Anti-proliferative<br>Apoptosis<br>Increases survival<br>Reduces tumor growth (only CBD + $\Delta^9$ -THC + TMZ)<br>Sativex-like combination of CBD and $\Delta^9$ -THC (1:1 ratio) ± TMZ: | N.D.                                                                                                                                                                | Yes | Yes |
| López-Valero et al. (2018) [18] | U87MG                                                          | ND<br>*                                                                              |  | Anti-tumor<br>Anti-proliferative<br>Apoptosis<br>Autophagy<br>Reduces Tumor                                                                                                                                                | N.D.                                                                                                                                                                | Yes | Yes |

|                                    |                                                |                             | Size               | Total tumor regression (>50%)                                                                                |      |                                                                                                                                                                                                             |              |              |
|------------------------------------|------------------------------------------------|-----------------------------|--------------------|--------------------------------------------------------------------------------------------------------------|------|-------------------------------------------------------------------------------------------------------------------------------------------------------------------------------------------------------------|--------------|--------------|
|                                    |                                                |                             | Increases survival |                                                                                                              |      |                                                                                                                                                                                                             |              |              |
| Aparicio-Blanco et al. (2019) [19] | U373MG                                         | 29.1                        |                    |                                                                                                              |      |                                                                                                                                                                                                             |              |              |
|                                    |                                                | 292.6 (20 nm sized LNC 48h) |                    |                                                                                                              |      |                                                                                                                                                                                                             |              |              |
|                                    |                                                | 129.1 (20 nm sized LNC 96h) |                    |                                                                                                              |      |                                                                                                                                                                                                             |              |              |
|                                    |                                                | 615.4 (50 nm sized LNC 48h) |                    |                                                                                                              |      |                                                                                                                                                                                                             |              |              |
|                                    |                                                | 375.4 (50 nm sized LNC 96h) |                    | Anti-proliferative                                                                                           | N.D. | Yes                                                                                                                                                                                                         | No           |              |
| Kosgodage et al. (2019) [20]       | LN18 (chemo-resistant) LN229 (chemo-sensitive) | ND                          |                    |                                                                                                              |      |                                                                                                                                                                                                             |              |              |
|                                    |                                                | ****                        |                    | CBD ± TMZ: Anti-proliferative                                                                                |      | Increases extracellular vesicles and within them, increases anti-oncogenic miR-126, decreased pro-oncogenic miR-21 levels                                                                                   | Yes          | No           |
|                                    |                                                |                             |                    |                                                                                                              |      | Reduces prohibitin (mitochondrial protective and chemo-resistant functions)                                                                                                                                 |              |              |
| Ivanov et al. (2019) [21]          | U87MG U118MG T98G                              | ND                          |                    |                                                                                                              |      |                                                                                                                                                                                                             |              |              |
|                                    |                                                | *****                       |                    | CBD + $\gamma$ -irradiation + ATM inhibitor (KU60019): Apoptosis Cell cycle (G2/M) arrest Anti-proliferative |      | Increases PD-L1 Produces pro-inflammatory cytokines (IL1 $\beta$ , IL6, IL8) Produces FAS-L and TRAIL Upregulates DR5 and TRAIL-R2 Activates JNK-AP1 and NF- $\kappa$ B leading to TRAIL-mediated apoptosis | Missing into | Missing info |

ND = Not determined, \* MTT colorimetric assay, \*\* Crystal Violet vital staining/spectrophotometer, \*\*\* fluorescence from cellular reduction of resazurin to resarufin, \*\*\*\*WST-1, \*\*\*\*\* Guava Via Count cell death assay, \*\*\*\*\*CellTiter-Glo Luminescent Cell Viability Assay, DOXO: doxorubicin, BCNU:

Carmustine, TMZ: temozolomide; Transient receptor potential (TRP); GBM: Glioblastoma multiforme; LNC: lipid nanocapsules (form of CBD administration). All IC<sub>50</sub> values were converted to  $\mu\text{M}$  for continuity using the molar mass for CBD (314.464 g/mol). NOTE: only pure CBD results were discussed, combination with other treatment modalities were mentioned.

1. Jacobsson, S.O.P.; Rongård, E.; Stridh, M.; Tiger, G.; Fowler, C.J. Serum-dependent effects of tamoxifen and cannabinoids upon C6 glioma cell viability. *Biochem. Pharmacol.* **2000**, *60*, 1807–1813, doi:10.1016/s0006-2952(00)00492-5.
2. Massi P.; Vaccani A.; Ceruti S.; Colombo A.; Abbracchio MP.; Parolaro D., Antitumor effects of cannabidiol, a non-psychoactive cannabinoid, on human glioma cell lines. *Journal of Pharmacology and Experimental Therapeutics.* **2003**, *10(2)*, 255–267.
3. Vaccani, A.; Massi, P.; Colombo, A.; Rubino, T.; Parolaro, D. Cannabidiol inhibits human glioma cell migration through a cannabinoid receptor-independent mechanism. *Br. J. Pharmacol.* **2005**, *144*, 1032–1036, doi:10.1038/sj.bjpp.0706134.
4. Massi P.; Vaccani A.; Bianchessi S.; Costa B.; Macchi P.; Parolaro D., The non-psychoactive cannabidiol triggers caspase activation and oxidative stress in human glioma cells *Cell Mol Life Sci.* **2006**, *63(17)*, 2057–2066.
5. Ligresti, A.; Moriello, A.S.; Starowicz, K.; Matias, I.; Pisanti, S.; De Petrocellis, L.; Laezza, C.; Portella, G.; Bifulco, M.; Di Marzo, V. Antitumor Activity of Plant Cannabinoids with Emphasis on the Effect of Cannabidiol on Human Breast Carcinoma. *J. Pharmacol. Exp. Ther.* **2006**, *318*, 1375–1387, doi:10.1124/jpet.106.105247.
6. Massi, P.; Valenti, M.; Vaccani, A.; Gasperi, V.; Perletti, G.; Marras, E.; Fezza, F.; Maccarrone, M.; Parolaro, D. 5-Lipoxygenase and anandamide hydrolase (FAAH) mediate the antitumor activity of cannabidiol, a non-psychoactive cannabinoid. *J. Neurochem.* **2008**, *104*, 1091–1100, doi:10.1111/j.1471-4159.2007.05073.x.
7. Marcu, J.P.; Christian, R.T.; Lau, D.; Zielinski, A.J.; Horowitz, M.P.; Lee, J.; Pakdel, A.; Allison, J.; Limbad, C.; Moore, D.H.; et al. Cannabidiol Enhances the Inhibitory Effects of 9-Tetrahydrocannabinol on Human Glioblastoma Cell Proliferation and Survival. *Mol. Cancer Ther.* **2010**, *9*, 180–189, doi:10.1158/1535-7163.mct-09-0407.
8. Torres, S.; Lorente, M.; Rodríguez-Fornés, F.; Hernández-Tiedra, S.; Salazar, M.; García-Taboada, E.; Barcia, J.; Guzmán, M.; Velasco, G. A Combined Preclinical Therapy of Cannabinoids and Temozolomide against Glioma. *Mol. Cancer Ther.* **2011**, *10*, 90–103, doi:10.1158/1535-7163.mct-10-0688.
9. Nabissi, M.; Morelli, M.B.; Santoni, M.; Santoni, G. Triggering of the TRPV2 channel by cannabidiol sensitizes glioblastoma cells to cytotoxic chemotherapeutic agents. *Carcinog.* **2012**, *34*, 48–57, doi:10.1093/carcin/bgs328.
10. Solinas, M.; Massi, P.; Cinquina, V.; Valenti, M.; Bolognini, D.; Gariboldi, M.; Monti, E.; Rubino, T.; Parolaro, D. Cannabidiol, a Non-Psychoactive Cannabinoid Compound, Inhibits Proliferation and Invasion in U87-MG and T98G Glioma Cells through a Multitarget Effect. *PLOS ONE* **2013**, *8*, e76918, doi:10.1371/journal.pone.0076918.
11. De La Ossa, D.H.P.; Lorente, M.; Gil-Alegre, M.E.; Torres, S.; García-Taboada, E.; Aberturas, M.D.R.; Molpeceres, J.; Velasco, G.; Torres-Suárez, A. Local Delivery of Cannabinoid-Loaded Microparticles Inhibits Tumor Growth in a Murine Xenograft Model of Glioblastoma Multiforme. *PLOS ONE* **2013**, *8*, e54795, doi:10.1371/journal.pone.0054795.
12. Scott, K.A.; Dalglish, A.G.; Liu, W.M. The Combination of Cannabidiol and  $\Delta^9$ -Tetrahydrocannabinol Enhances the Anticancer Effects of Radiation in an Orthotopic Murine Glioma Model. *Mol. Cancer Ther.* **2014**, *13*, 2955–2967, doi:10.1158/1535-7163.mct-14-0402.
13. Nabissi M.; Morelli MB.; Amantini C., et al. Cannabidiol stimulates A ml-1a-dependent glial differentiation and inhibits glioma stem-like cells proliferation by inducing autophagy in a TRPV 2-dependent manner. *International journal of cancer.* **2015**, *137(8)*, 1855–1869.
14. A Scott, K.; Dennis, J.L.; Dalglish, A.G.; Liu, W.M. Inhibiting Heat Shock Proteins Can Potentiate the Cytotoxic Effect of Cannabidiol in Human Glioma Cells. *Anticancer. Res.* **2015**, *35*.

15. Deng, L.; Ng, L.; Ozawa, T.; Stella, N. Quantitative Analyses of Synergistic Responses between Cannabidiol and DNA-Damaging Agents on the Proliferation and Viability of Glioblastoma and Neural Progenitor Cells in Culture. *J. Pharmacol. Exp. Ther.* **2017**, *360*, 215–224, doi:10.1124/jpet.116.236968.
16. Ivanov, V.N.; Wu, J.; Hei, T.K. Regulation of human glioblastoma cell death by combined treatment of cannabidiol,  $\gamma$ -radiation and small molecule inhibitors of cell signaling pathways. *Oncotarget* **2017**, *8*, 74068–74095, doi:10.18632/oncotarget.18240.
17. López-Valero, I.; Saiz-Ladera, C.; Torres, S.; Hernández-Tiedra, S.; García-Taboada, E.; Rodríguez-Fornés, F.; Barba, M.; Dávila, D.; Salvador-Tormo, N.; Guzmán, M.; et al. Targeting Glioma Initiating Cells with A combined therapy of cannabinoids and temozolomide. *Biochem. Pharmacol.* **2018**, *157*, 266–274, doi:10.1016/j.bcp.2018.09.007.
18. López-Valero, I.; Torres, S.; Salazar-Roa, M.; García-Taboada, E.; Hernández-Tiedra, S.; Guzmán, M.; Sepúlveda, J.M.; Velasco, G.; Lorente, M. Optimization of a preclinical therapy of cannabinoids in combination with temozolomide against glioma. *Biochem. Pharmacol.* **2018**, *157*, 275–284, doi:10.1016/j.bcp.2018.08.023.
19. Aparicio-Blanco, J.; Sebastián, V.; Benoit, J.-P.; Torres-Suárez, A. Lipid nanocapsules decorated and loaded with cannabidiol as targeted prolonged release carriers for glioma therapy: In vitro screening of critical parameters. *Eur. J. Pharm. Biopharm.* **2019**, *134*, 126–137, doi:10.1016/j.ejpb.2018.11.020.
20. Kosgodage, U.S.; Uysal-Onganer, P.; MacLachy, A.; Mould, R.; Nunn, A.V.; Guy, G.W.; Kraev, I.; Chatterton, N.P.; Thomas, E.L.; Inal, J.M.; et al. Cannabidiol Affects Extracellular Vesicle Release, miR21 and miR126, and Reduces Prohibitin Protein in Glioblastoma Multiforme Cells. *Transl. Oncol.* **2019**, *12*, 513–522, doi:10.1016/j.tranon.2018.12.004.
21. Ivanov VN.; Wu J.; Wang TJ.; Hei TK., Inhibition of ATM kinase upregulates levels of cell death induced by cannabidiol and  $\gamma$ -irradiation in human glioblastoma cells. *Oncotarget.* **2019**, *10*(8), 825.

Table S2. CBD's effect on Breast Cancer.

| Paper                     | Breast Cancer cell line                        | IC <sub>50</sub> ( $\mu$ M)                  | Effect on cancer cells                                                                                                                                                                             | Mechanism of action                                                                                                                                                                                     | Tested in cell line? | Tested in mouse model? |
|---------------------------|------------------------------------------------|----------------------------------------------|----------------------------------------------------------------------------------------------------------------------------------------------------------------------------------------------------|---------------------------------------------------------------------------------------------------------------------------------------------------------------------------------------------------------|----------------------|------------------------|
| Ligresti et al. (2006)[1] | MCF-7<br>MDA-MB-231                            | 8.2 $\pm$ 0.3<br>10.6 $\pm$ 1.8<br>*         | Anti-proliferative<br>Cell-cycle arrest (increases in G <sub>1</sub> , S) (MCF-7 specific)<br>Apoptosis (MDA-MB-231 specific)<br>Reduces tumor size/volume<br>Reduces in number of lung metastasis | Activates CB <sub>2</sub> and TRPV1<br>Generates ROS                                                                                                                                                    | Yes                  | Yes                    |
| Sultan et al. (2018) [2]  | T-47D<br>MDA-MB-231                            | 5<br>2.2<br>**                               | Anti-proliferative<br>Induces apoptosis                                                                                                                                                            | Downregulates of mTOR and Cyclin D1<br>Upregulates PPAR $\gamma$ protein levels and nuclear localization                                                                                                | Yes                  | No                     |
| Elbaz et al. (2015) [3]   | SUM159<br>SCP2<br>4T1.2<br>MDA-MB-231<br>MVT-1 | NS<br>DDR<br>(SUM159, SCP2, and 4T1.2)<br>** | Anti-proliferative<br>Inhibits migration of cells<br>Inhibits invasive activity<br>Inhibits tumor growth (reduction in size/volume/weight)<br>Inhibits tumor vascularization                       | Suppresses activation of EGF/EGFR signal transduction pathways<br>Inhibits activation of EGFR, AKT, p42/44 MAPK and NF-kB<br>Inhibits secretion of MMP, expression of phalloidin and actin stress fiber | Yes                  | Yes                    |

|                               |                                                                |                                                                        |  |                                                                                                                                                                                                                                                |                                                                                                                                                                                                                                                                                                                                                                                                                                        |     |     |
|-------------------------------|----------------------------------------------------------------|------------------------------------------------------------------------|--|------------------------------------------------------------------------------------------------------------------------------------------------------------------------------------------------------------------------------------------------|----------------------------------------------------------------------------------------------------------------------------------------------------------------------------------------------------------------------------------------------------------------------------------------------------------------------------------------------------------------------------------------------------------------------------------------|-----|-----|
|                               |                                                                |                                                                        |  | Reduction in lung metastasis (number and volume)                                                                                                                                                                                               | Decreases recruitment of macrophages to tumor through decreased microenvironmental changes (decreased GM-CSF, CCL3 and MIP-2 levels)                                                                                                                                                                                                                                                                                                   |     |     |
| McAllister et al. (2007) [4]  | MDA-MB-231<br>MDA-MB-231-Id-1<br>MDA-MB-436                    | 1.3 (1.0-1.9)<br>1.6 (1.1-2.2)<br>**                                   |  | Anti-proliferative<br>Reduces invasion of cells                                                                                                                                                                                                | Inhibits Id-1 (inhibiting transcription at the promoter level)                                                                                                                                                                                                                                                                                                                                                                         | Yes | No  |
| McAllister et al. (2011) [5]  | MDA-MB-231<br>4T1                                              | NT<br>1.5 (1.3-1.7)<br>**                                              |  | Anti-proliferative<br>Reduces invasion of cells<br>Cell cycle arrest (increases G <sub>0</sub> and G <sub>1</sub> cells while decreasing S cells)<br>Reduces tumor size (not weight)<br>Reduces number of lung metastases (specifically >2 mm) | Inhibits Id-1 gene expression, proliferation and invasion (mouse model)<br>Modulates ERK and ROS, which both decrease Id-1 expression                                                                                                                                                                                                                                                                                                  | Yes | Yes |
| Shrivastava et al. (2011) [6] | MCF-7<br>ZR-75-1<br>MDA-MB-231<br>SK-BR-3<br>MCF-10A = control | NS<br>DDR<br>(Estrogen receptor + and - cells)<br>Little effect<br>*** |  | Anti-proliferative<br>Apoptosis<br>Autophagy                                                                                                                                                                                                   | Independent of CB <sub>1</sub> , CB <sub>2</sub> , and vanilloid<br>Initiates internal (t-BID translocation) and external (Fas-L death receptor engagement) stimuli leading to mitochondrial-mediated apoptosis<br>ER stress leads to increased autophagy<br>Generates ROS<br>Inhibits AKT/mTOR signaling leading to apoptosis and autophagy<br>Balance between autophagy and apoptosis through cleavage and translocation of beclin-1 | Yes | No  |
| Kosgodage et al. (2018) [7]   | MD-MB-231                                                      | NS<br>DDR<br>**<br>****                                                |  | Anti-proliferative<br>Increases cisplatin-mediated apoptosis/sensitization of cells to chemotherapy                                                                                                                                            | Inhibits EMV, MV (100-200nm), and particularly exosome release<br>Modulates mitochondrial function<br>Decreases expression                                                                                                                                                                                                                                                                                                             | Yes | No  |

|                          |                       |     |           | of mitochondrial-associated proteins prohibitin and STAT3                                                            |                                   |     |     |
|--------------------------|-----------------------|-----|-----------|----------------------------------------------------------------------------------------------------------------------|-----------------------------------|-----|-----|
| Murase et al. (2014) [8] | MDA-MB-231            | 1.9 | (1.5-2.5) | Anti-proliferative<br>Anti-metastatic activity (reduced number, cell proliferation, and growth)<br>Prolongs survival | Produces ROS<br>Downregulates Id1 | Yes | Yes |
|                          | MDA-MB-231-Id-1       | 2.8 |           |                                                                                                                      |                                   |     |     |
|                          | MDA-MB-231-luc-D3H2LN | 1.8 | (1.2-2.7) |                                                                                                                      |                                   |     |     |
|                          | 4T1                   | **  |           |                                                                                                                      |                                   |     |     |
| Ward et al. (2013) [9]   | LN 231                | 2.7 |           | Protective against paclitaxel-induced neurotoxicity<br>Synergistic inhibition of viability with paclitaxel           | Induces 5-HT1A receptor system    | Yes | Yes |
|                          | MDA-MB-231-luc-D3H2LN | 4.1 | **        |                                                                                                                      |                                   |     |     |
|                          |                       |     |           |                                                                                                                      |                                   |     |     |

ND: Not determined, NS: Not stated but viability tested, DDR: Dose dependent response.

\* Crystal Violet Staining, \*\* MTT cell proliferation assay, \*\*\* MTS viability assay, \*\*\*\* EasyCyte 8HT flow cytometer and ViaCount assay.

- Ligresti, A.; Moriello, A.S.; Starowicz, K.; Matias, I.; Pisanti, S.; De Petrocellis, L.; Laezza, C.; Portella, G.; Bifulco, M.; Di Marzo, V. Antitumor Activity of Plant Cannabinoids with Emphasis on the Effect of Cannabidiol on Human Breast Carcinoma. *J. Pharmacol. Exp. Ther.* **2006**, *318*, 1375–1387, doi:10.1124/jpet.106.105247.
- Sultan, A.S.; Marie, M.A.; Sheweita, S.A. Novel mechanism of cannabidiol-induced apoptosis in breast cancer cell lines. *Breast* **2018**, *41*, 34–41, doi:10.1016/j.breast.2018.06.009.
- Elbaz, M.; Nasser, M.W.; Ravi, J.; Wani, N.A.; Ahirwar, D.; Zhao, H.; Oghumu, S.; Satoskar, A.R.; Shilo, K.; Carson, W.E.; et al. Modulation of the tumor microenvironment and inhibition of EGF/EGFR pathway: Novel anti-tumor mechanisms of Cannabidiol in breast cancer. *Mol. Oncol.* **2015**, *9*, 906–919, doi:10.1016/j.molonc.2014.12.010.
- McAllister, S.D.; Christian, R.T.; Horowitz, M.P.; Garcia, A.; Desprez, P.-Y. Cannabidiol as a novel inhibitor of Id-1 gene expression in aggressive breast cancer cells. *Mol. Cancer Ther.* **2007**, *6*, 2921–2927, doi:10.1158/1535-7163.mct-07-0371.
- McAllister, S.D.; Murase, R.; Christian, R.T.; Lau, D.; Zielinski, A.J.; Allison, J.; Almanza, C.; Pakdel, A.; Lee, J.; Limbad, C.; et al. Pathways mediating the effects of cannabidiol on the reduction of breast cancer cell proliferation, invasion, and metastasis. *Breast Cancer Res. Treat.* **2011**, *129*, 37–47, doi:10.1007/s10549-010-1177-4.
- Shrivastava, A.; Kuzontkoski, P.M.; Groopman, J.E.; Prasad, A. Cannabidiol Induces Programmed Cell Death in Breast Cancer Cells by Coordinating the Cross-talk between Apoptosis and Autophagy. *Mol. Cancer Ther.* **2011**, *10*, 1161–1172, doi:10.1158/1535-7163.mct-10-1100.
- Kosgodage, U.S.; Mould, R.; Henley, A.B.; Nunn, A.V.; Guy, G.W.; Thomas, E.L.; Inal, J.M.; Bell, J.D.; Lange, S. Cannabidiol (CBD) Is a Novel Inhibitor for Exosome and Microvesicle (EMV) Release in Cancer. *Front. Pharmacol.* **2018**, *9*, 889, doi:10.3389/fphar.2018.00889.



8. Murase, R.; Kawamura, R.; Singer, E.; Pakdel, A.; Sarma, P.; Judkins, J.; Elwakeel, E.; Dayal, S.; Martínez-Martínez, E.; Amere, M.; et al. Targeting multiple cannabinoid anti-tumour pathways with a resorcinol derivative leads to inhibition of advanced stages of breast cancer. *Br. J. Pharmacol.* **2014**, *171*, 4464–4477, doi:10.1111/bph.12803.
9. Ward, S.J.; McAllister, S.D.; Kawamura, R.; Murase, R.; Neelakantan, H.; A Walker, E. Cannabidiol inhibits paclitaxel-induced neuropathic pain through 5-HT<sub>1A</sub> receptors without diminishing nervous system function or chemotherapy efficacy. *Br. J. Pharmacol.* **2014**, *171*, 636–645, doi:10.1111/bph.12439.

10. **Table S3.** CBD's Effect on Lung Cancer.

| Paper                      | Lung Cancer cell line                                                                             | IC <sub>50</sub> (μM)  | Effect on cancer cells                          | Mechanism of action                                                                                                               | Tested in cell line? | Tested in mouse model? |
|----------------------------|---------------------------------------------------------------------------------------------------|------------------------|-------------------------------------------------|-----------------------------------------------------------------------------------------------------------------------------------|----------------------|------------------------|
| Ramer et al. (2010) [1]    | A549                                                                                              | ND                     | Anti-invasive<br>Anti-metastatic                | Induces TIMP-1                                                                                                                    | Yes                  | Yes                    |
| Ramer et al. (2010) [2]    | A549<br>H460<br>H358                                                                              | ND                     | Anti-invasive<br>(independent of drug toxicity) | Downregulates PAI-1<br>Dependent on CB <sub>1</sub> , CB <sub>2</sub> and TRPV1<br>Activates p42/44 MAPK                          | Yes                  | Yes                    |
| Ramer et al. (2012) [3]    | A549<br>H460                                                                                      | ND                     | Anti-invasive<br>Anti-metastatic                | Increases downstream ICAM-1 prior to TIMP-1 induction<br>Dependent on CB <sub>1</sub> , CB <sub>2</sub> and TRPV1                 | Yes                  | Yes                    |
| Ramer et al. (2013) [4]    | A549<br>H460<br>Primary lung tumor cells obtained from a patient with additional brain metastasis | 3.47<br>2.80<br>0.124* | Apoptosis                                       | Induces COX-2 and its derived products PGD <sub>2</sub> and 15d-PGJ <sub>2</sub><br>Activates PPAR-γ                              | Yes                  | Yes                    |
| Haustein et al. (2014) [5] | A549<br>H460<br>Brain metastatic cells from patient with primary lung tumor<br>BEAS-2B (control)  | ND                     | Anti-invasive<br>Adhesion                       | Increases LAK cell-mediated tumor cell lysis through increased ICAM-1<br>Dependent on CB <sub>1</sub> , CB <sub>2</sub> and TRPV1 | Yes                  | Yes                    |

ND: Not determined.

\* WST-1 assay.

- Ramer, R.; Merkord, J.; Rohde, H.; Hinz, B. Cannabidiol inhibits cancer cell invasion via upregulation of tissue inhibitor of matrix metalloproteinases-1. *Biochem. Pharmacol.* **2010**, *79*, 955–966, doi:10.1016/j.bcp.2009.11.007.
- Ramer, R.; Rohde, A.; Merkord, J.; Rohde, H.; Hinz, B. Decrease of Plasminogen Activator Inhibitor-1 May Contribute to the Anti-Invasive Action of Cannabidiol on Human Lung Cancer Cells. *Pharm. Res.* **2010**, *27*, 2162–2174, doi:10.1007/s11095-010-0219-2.
- Ramer, R.; Bublitz, K.; Freimuth, N.; Merkord, J.; Rohde, H.; Haustein, M.; Borchert, P.; Schmuhl, E.; Linnebacher, M.; Hinz, B. Cannabidiol inhibits lung cancer cell invasion and metastasis via intercellular adhesion molecule-1. *FASEB J.* **2011**, *26*, 1535–1548, doi:10.1096/fj.11-198184.

4. Ramer, R.; Heinemann, K.; Merkord, J.; Rohde, H.; Salamon, A.; Linnebacher, M.; Hinz, B. COX-2 and PPAR- Confer Cannabidiol-Induced Apoptosis of Human Lung Cancer Cells. *Mol. Cancer Ther.* **2012**, *12*, 69–82, doi:10.1158/1535-7163.mct-12-0335.
5. Haustein, M.; Ramer, R.; Linnebacher, M.; Manda, K.; Hinz, B. Cannabinoids increase lung cancer cell lysis by lymphokine-activated killer cells via upregulation of ICAM-1. *Biochem. Pharmacol.* **2014**, *92*, 312–325, doi:10.1016/j.bcp.2014.07.014.

**Table S4.** CBD's effect on Colorectal Cancers.

| Paper                            | CRC line                                                    | cell | IC <sub>50</sub> (μM)                        | Effect on cells                                                        | on cancer | Mechanism of action                                                                                                                            | of | Tested in cell line? | Tested in mouse model? |
|----------------------------------|-------------------------------------------------------------|------|----------------------------------------------|------------------------------------------------------------------------|-----------|------------------------------------------------------------------------------------------------------------------------------------------------|----|----------------------|------------------------|
| Sreevalsan et al. (2011) [1]     | SW480                                                       |      | 5.95 after 2 days<br>5.06 after 3 days<br>** | Anti-proliferative<br>Apoptosis                                        |           | Induces phosphatases<br>Dependent on CB <sub>1</sub> and CB <sub>2</sub>                                                                       |    | Yes                  | No                     |
| Aviello et al. (2012) [2]        | Caco-2<br>HCT116                                            |      | 0.67 (0.0145-31.4)<br>*                      | Anti-proliferative<br>Reduces aberrant crypt foci, polyps, and tumors. |           | Downregulates pAKT<br>Upregulates caspase-3<br>Protects against oxidative damage<br>Dependent on CB <sub>1</sub> , TRPV1 and PPAR <sub>γ</sub> |    | Yes                  | Yes                    |
| Macpherson et al. (2014) [3]     | Caco-2                                                      |      | ND                                           | Anti-proliferative                                                     |           | Induces ROS production                                                                                                                         |    |                      |                        |
|                                  | SW480                                                       |      | 16.4 ± 2.5                                   |                                                                        |           |                                                                                                                                                |    |                      |                        |
|                                  | SW620                                                       |      | ND                                           |                                                                        |           |                                                                                                                                                |    |                      |                        |
|                                  | HT-29                                                       |      | 19.8 ± 4.4                                   |                                                                        |           |                                                                                                                                                |    |                      |                        |
| Raup-Konsavage et al. (2018) [4] | DLD-1<br>HCT116<br>LS174<br>RKO<br>CCD<br>CoTr<br>(Control) | 841  | 4.4 ± 19.8<br>1.4<br>ND<br>ND<br>*           | Anti-proliferative<br>Chemoprotective effect                           |           | Reduces Wnt/ <i>B</i> -catenin pathway before translocation of <i>B</i> -catenin                                                               |    | Yes                  | No                     |
| Jeong et al. (2019) [5]          | DLD-1<br>Colo205 (oxaliplatin resistant strains)            |      | NS<br>DDR<br>***                             | <i>CBD + Oxaliplatin:</i><br>Autophagy                                 |           | Produces NOS3<br>Induces ROS (including mitochondrial ROS)<br>Induces mitochondrial dysfunction via reduced SOD2 expression                    |    | Yes                  | Yes                    |
| Jeong et al. (2019) [6]          | DCRC<br>HCT116<br>DLD-1<br>CCD-18co                         |      | ND<br>***                                    | Apoptosis<br>Decreases tumor size                                      | tumor     | Induces Noxa activation through:<br>Increased ROS<br>Increased ER stress                                                                       |    | Yes                  | Yes                    |

|                       |                                                |    |              |           |                                          |     |     |
|-----------------------|------------------------------------------------|----|--------------|-----------|------------------------------------------|-----|-----|
| Kim et al. (2019) [7] | (control)                                      | NS | CBD + TRAIL: | Apoptosis | Activates CHOP vis ROS-induced ER stress | Yes | Yes |
|                       | HCT116<br>HT26<br>DLD-1<br>Control:<br>CCD18CO |    |              |           |                                          |     |     |

ND: Not determined, NS: Not stated, DDR: Dose dependent response.

\* MTT assay, \*\* Cells counted for IC<sub>50</sub> \*\*\* WST-1 assay.

1. Sreevalsan, S.; Joseph, S.; Jutooru, I.; Chadalapaka, G.; Safe, S. Induction of apoptosis by cannabinoids in prostate and colon cancer cells is phosphatase dependent. *Anticancer. Res.* 2011, *31*, 3799–807.
2. Aviello, G.; Romano, B.; Borrelli, F.; Capasso, R.; Gallo, L.; Piscitelli, F.; Di Marzo, V.; Izzo, A.A. Chemopreventive effect of the non-psychotropic phytocannabinoid cannabidiol on experimental colon cancer. *J. Mol. Med.* **2012**, *90*, 925–934, doi:10.1007/s00109-011-0856-x.
3. MacPherson, T.; Armstrong, J.A.; Criddle, D.N.; Wright, K.L. Physiological intestinal oxygen modulates the Caco-2 cell model and increases sensitivity to the phytocannabinoid cannabidiol. *Vitr. Cell. Dev. Biol. - Anim.* **2014**, *50*, 417–426, doi:10.1007/s11626-013-9719-9.
4. Raup-Konsavage, W.M.; Johnson, M.; Legare, C.A.; Yochum, G.S.; Morgan, D.J.; Vrana, K.E. Synthetic Cannabinoid Activity Against Colorectal Cancer Cells. *Cannabis Cannabinoid Res.* **2018**, *3*, 272–281, doi:10.1089/can.2018.0065.
5. Jeong, S.; Kim, B.G.; Kim, D.Y.; Kim, B.R.; Kim, J.L.; Park, S.H.; Na, Y.J.; Jo, M.J.; Yun, H.K.; Jeong, Y.A.; et al. Cannabidiol Overcomes Oxaliplatin Resistance by Enhancing NOS3- and SOD2-Induced Autophagy in Human Colorectal Cancer Cells. *Cancers* **2019**, *11*, 781, doi:10.3390/cancers11060781.
6. Jeong, S.; Yun, H.K.; Jeong, Y.A.; Jo, M.J.; Kang, S.H.; Kim, J.L.; Kim, D.Y.; Park, S.H.; Kim, B.R.; Na, Y.J.; et al. Cannabidiol-induced apoptosis is mediated by activation of Noxa in human colorectal cancer cells. *Cancer Lett.* **2019**, *447*, 12–23, doi:10.1016/j.canlet.2019.01.011.
7. Kim, J.L.; Kim, B.R.; Kim, D.Y.; Jeong, Y.A.; Jeong, S.; Na, Y.J.; Park, S.H.; Yun, H.K.; Jo, M.J.; Kim, B.G.; et al. Cannabidiol Enhances the Therapeutic Effects of TRAIL by Upregulating DR5 in Colorectal Cancer. *Cancers* **2019**, *11*, 642, doi:10.3390/cancers11050642.

**Table S5.** CBD's effect on Leukemia and Lymphoma.

| Paper                      | Leukemia/Lymphoma cell line                                    | IC <sub>50</sub> (μM) | Effect on cancer cells                                 | Mechanism of Action                                                                                                                                                      | Tested in cell line? | Tested in mouse model? |
|----------------------------|----------------------------------------------------------------|-----------------------|--------------------------------------------------------|--------------------------------------------------------------------------------------------------------------------------------------------------------------------------|----------------------|------------------------|
| Gallily et al. (2003) [1]  | <u>Leukemia</u><br>HL-60                                       | ND                    | CBD + γ irradiation: Apoptosis                         | Activates caspase-3                                                                                                                                                      | Yes                  | No                     |
| Ligresti et al. (2006) [2] | <u>Leukemia</u><br>RBL-2H3                                     | 6.3 ± 1.5<br>*        | ND                                                     | ND                                                                                                                                                                       | Yes                  | No                     |
| McKallip et al. (2006) [3] | <u>Lymphoma</u><br>EL-4<br><u>Leukemia</u><br>Jurkat<br>MOLT-4 | ND<br>****            | Anti-proliferative Apoptosis<br>Decreases tumor burden | Independent of CB <sub>1</sub> and TRPV1<br>Dependent on CB <sub>2</sub><br>Induces ROS<br>Reduces mitochondrial membrane potential<br>Induces cleavage of caspase-8 and | Yes                  | Yes                    |

|                                  |                                                     |                                                                                                             |                                                                                                                                                                                                            |    |                                                                                                                                            |     |    |
|----------------------------------|-----------------------------------------------------|-------------------------------------------------------------------------------------------------------------|------------------------------------------------------------------------------------------------------------------------------------------------------------------------------------------------------------|----|--------------------------------------------------------------------------------------------------------------------------------------------|-----|----|
|                                  |                                                     |                                                                                                             |                                                                                                                                                                                                            |    | Bid, and reduction of procaspase-2, -9, -10<br>Increases cytosolic cytochrome C<br>Increases Nox4 and p22 <sup>phox</sup><br>Reduces p-p38 |     |    |
| Lee et al. (2008) [4]            | <u>Lymphoma</u><br>EL-4<br>Murine thymocytes        | 10.75 ± 1.35<br>7.01 ± 0.31                                                                                 | Apoptosis                                                                                                                                                                                                  |    | Induces ROS<br>Decreases cellular thiols                                                                                                   | Yes | No |
|                                  |                                                     |                                                                                                             | <i>CBD + Δ<sup>9</sup>-THC or CBG + VIN or CYT</i><br>Anti-proliferative<br>Apoptosis<br>Decreases dose of chemotherapies required<br>Killing effect is sequence dependent (chemo then phytocannabinoids ) |    |                                                                                                                                            |     |    |
| Scott et al. (2017) [5]          | <u>Leukemia</u><br>CEM<br>HL-60                     | 7.8 ± 0.21<br>12 **                                                                                         |                                                                                                                                                                                                            | ND |                                                                                                                                            | Yes | No |
|                                  |                                                     | 6.4 ± 2.9<br>(5% serum )<br>2.5 ± 0.2<br>(1% serum )<br>43.4 ± 5.1<br>(12% O <sub>2</sub> )<br>****<br>**** | Anti-proliferative<br>Induces cell cycle arrest (G1 increase)<br>Increases number of small cells<br>Additive effect with Doxorubicin                                                                       |    | Reduces pPKB/pAkt and ribosomal protein S6                                                                                                 | Yes | No |
| Kalenderoglu et al. (2017) [6]   | <u>T-ALL</u><br>Jurkat                              |                                                                                                             |                                                                                                                                                                                                            |    |                                                                                                                                            |     |    |
|                                  | <u>T-ALL</u><br>Jurkat<br>MOLT-3<br>CCFR-CEM        |                                                                                                             | At low concentrations, increases proliferation and autophagy                                                                                                                                               |    | Targets mitochondria in T-ALL<br>Induces ROS<br>Reduces mitochondrial transmembrane potential                                              |     |    |
| Olivas-Aguirre et al. (2019) [7] | <u>B-ALL</u><br>Reh<br>RS4;11<br><u>CML</u><br>K562 | ND<br>***                                                                                                   | Anti-proliferative at higher concentrations<br>Inhibits migration<br>Apoptosis and early necrosis<br>Changes cell                                                                                          |    | Induces Cytochrome-C release<br>Induces mitochondrial                                                                                      | Yes | No |

|                          |                                            |             |                                |                                                                                                                                                                                                                                                                                                                                                                                                                                                                                                                                                                                                                                    |     |    |  |
|--------------------------|--------------------------------------------|-------------|--------------------------------|------------------------------------------------------------------------------------------------------------------------------------------------------------------------------------------------------------------------------------------------------------------------------------------------------------------------------------------------------------------------------------------------------------------------------------------------------------------------------------------------------------------------------------------------------------------------------------------------------------------------------------|-----|----|--|
|                          |                                            |             | morphology                     | Ca <sup>2+</sup> overload from intracellular stores via mitochondrial Ca <sup>2+</sup> uniporter<br>Induces mitochondrial permeability transition pore opening and subsequent Ca <sup>2+</sup> release from the ER<br>Independent of CB <sub>1</sub> , CB <sub>2</sub> , and GRP55<br>In 3D analysis of CBD interacting with voltage-dependent anion channel, interacts with Thr9, Asp12, and Leu13 residues at the N-terminus and neighboring pore residues Val146, Gln157, Gly175, Gln182, and His184<br>Increases ICAM-1<br>Attenuates lymphokine-activated killer cell resistance to cell-mediated toxicity by AF1q via ICAM-1 |     |    |  |
| Togano et al. (2019) [8] | <u>Burkitt's Lymphoma</u><br>Jiyoye Mutu I | ND<br>***** | Enhances mediated cytotoxicity | cell-                                                                                                                                                                                                                                                                                                                                                                                                                                                                                                                                                                                                                              | Yes | No |  |

ND: Not determined.

Viability markers: \*Crystal Violet vital staining + spectrophotometer analysis, \*\* MTT-based assay, \*\*\* resazurin-based metabolic assay, \*\*\*\*Trypan blue dye exclusion, \*\*\*\*\*PrestoBlue.

CYT: cytarabine, VIN: vincristine.

CBG: cannabigerol.

ER: endoplasmic reticulum.

T-ALL: T-cell acute lymphoblastic leukemia, B-ALL: B-cell acute lymphoblastic leukemia, CML: Chronic myelogenous leukemia.

- Gallily, R.; Even-Chena, T.; Katzavian, G.; Lehmann, D.; Dagan, A.; Mechoulam, R.  $\gamma$ -Irradiation Enhances Apoptosis Induced by Cannabidiol, a Non-psychotropic Cannabinoid, in Cultured HL-60 Myeloblastic Leukemia Cells. *Leuk. Lymphoma* **2003**, *44*, 1767–1773, doi:10.1080/1042819031000103917.
- Ligresti, A.; Moriello, A.S.; Starowicz, K.; Matias, I.; Pisanti, S.; De Petrocellis, L.; Laezza, C.; Portella, G.; Bifulco, M.; Di Marzo, V. Antitumor Activity of Plant Cannabinoids with Emphasis on the Effect of Cannabidiol on Human Breast Carcinoma. *J. Pharmacol. Exp. Ther.* **2006**, *318*, 1375–1387, doi:10.1124/jpet.106.105247.
- McKallip, R.J.; Jia, W.; Schlomer, J.; Warren, J.W.; Nagarkatti, P.S.; Nagarkatti, M. Cannabidiol-Induced Apoptosis in Human Leukemia Cells: A Novel Role of Cannabidiol in the Regulation of p22phox and Nox4 Expression. *Mol. Pharmacol.* **2006**, *70*, 897–908, doi:10.1124/mol.106.023937.
- Lee, C.-Y.; Wey, S.-P.; Liao, M.-H.; Hsu, W.-L.; Wu, H.-Y.; Jan, T.-R. A comparative study on cannabidiol-induced apoptosis in murine thymocytes and EL-4 thymoma cells. *Int. Immunopharmacol.* **2008**, *8*, 732–740, doi:10.1016/j.intimp.2008.01.018.
- Scott, K.A.; Dalgleish, A.G.; Liu, W.M. Anticancer effects of phytocannabinoids used with chemotherapy in leukaemia cells can be improved by altering the sequence of their administration. *Int. J. Oncol.* **2017**, *51*, 369–377, doi:10.3892/ijo.2017.4022.
- Kalenderoglou, N.; MacPherson, T.; Wright, K.L. Cannabidiol Reduces Leukemic Cell Size – But Is It Important? *Front. Pharmacol.* **2017**, *8*, doi:10.3389/fphar.2017.00144.
- Olivas-Aguirre, M.; Torres-López, L.; Valle-Reyes, J.S.; Hernández-Cruz, A.; Pottosin, I.; Dobrovinskaya, O. Cannabidiol directly targets mitochondria and disturbs calcium homeostasis in acute lymphoblastic leukemia. *Cell Death Dis.* **2019**, *10*, 1–19, doi:10.1038/s41419-019-2024-0.
- Togano, T.; Kim, N.; Kim, N.; Park, G.S.; Park, A.K.; Bennet, M.; Park, J. The evaluation of Cannabidiol's effect on the immunotherapy of Burkitt lymphoma. *Biochem. Biophys. Res. Commun.* **2019**, *520*, 225–230, doi:10.1016/j.bbrc.2019.10.001.

Table S6. CBD's effect on Prostate Cancer.

| Paper                            | Prostate Cancer cell line | IC <sub>50</sub> (μM) | Effect on cancer cells                              | Mechanism of Action                                                                                                                                                                                                                                                        | Tested in cell line? | Tested in mouse model? |
|----------------------------------|---------------------------|-----------------------|-----------------------------------------------------|----------------------------------------------------------------------------------------------------------------------------------------------------------------------------------------------------------------------------------------------------------------------------|----------------------|------------------------|
| Ligresti et al (2006) [1]        | DU-145                    | 20 ± 1.8 *            | Anti-proliferative                                  | N.D.                                                                                                                                                                                                                                                                       | Yes                  | No                     |
| Sreevalsan et al. (2011) [2]     | LNCaP                     | 5.95 (2 days)         | Anti-proliferative Apoptosis                        | Caspase dependent Phosphatase dependent ( <i>DUSP1</i> , <i>DUSP4</i> and <i>DUSP10</i> mRNA induced) Dependent on CB <sub>2</sub> Enhances phosphorylation of p38 Induces PUMA and CHOP expression (intrinsic apoptosis pathway) Increases intracellular Ca <sup>2+</sup> | Yes                  | No                     |
|                                  |                           | 5.06 (3 days)         |                                                     |                                                                                                                                                                                                                                                                            |                      |                        |
| De Petrocellis et al. (2013) [3] | 22RV1                     | 25.0 ± 3 (72h)        | Anti-proliferative Apoptosis                        | Partially dependent on TRPM8 antagonism Downregulates androgen receptor (AR) Downregulates p53 (in AR expressing cells) Induces ROS (in AR                                                                                                                                 | Yes                  | Yes                    |
|                                  | DU-145                    | 5.7 ± 2 (16h starved) | Inhibits the cell cycle in DU-145 (G1-S transition) |                                                                                                                                                                                                                                                                            |                      |                        |
|                                  |                           | PC-3                  | 23.1 ± 7 (72h)                                      |                                                                                                                                                                                                                                                                            |                      |                        |
|                                  |                           | 8.4 ± 2 (16h starved) |                                                     |                                                                                                                                                                                                                                                                            |                      |                        |
|                                  |                           | 25.3 ± 8 (72h)        |                                                     |                                                                                                                                                                                                                                                                            |                      |                        |
|                                  |                           | 5.4 ± 1               |                                                     |                                                                                                                                                                                                                                                                            |                      |                        |

|                             |                         |                                                                      |                                                                 |                                                                                                                                                                                                                                                      |     |    |
|-----------------------------|-------------------------|----------------------------------------------------------------------|-----------------------------------------------------------------|------------------------------------------------------------------------------------------------------------------------------------------------------------------------------------------------------------------------------------------------------|-----|----|
|                             |                         | (16h starved)<br>17.4 ± 3<br>(72h)<br>5.2 ± 1<br>(16h starved)<br>** |                                                                 | expressing cells)<br>Upregulates p27 <sup>kip</sup><br>G-protein-coupled<br>estrogen receptor<br>dependent                                                                                                                                           |     |    |
| Sharma et al. (2014) [4]    | LNCaP<br>DU-145<br>PC-3 | ND<br>***                                                            | Anti-proliferative<br>Apoptosis<br>Cell cycle arrest<br>(G0/G1) | Downregulates CB <sub>1</sub> ,<br>CB <sub>2</sub> , AR expression<br>Downregulates PSA,<br>VEGF, IL-6, and IL-8<br>Inhibits spheroid<br>formation (prostate<br>cancer stem cell<br>property)<br>Reduces release of<br>exosomes and<br>microvesicles | Yes | No |
| Kosgodage et al. (2018) [5] | PC-3                    | ND<br>**                                                             | Anti-proliferative                                              | Reduces CD63<br>expression<br>Decreases oxygen<br>consumption rate<br>Reduces prohibitin and<br>STAT3 levels                                                                                                                                         | Yes | No |

ND: Not determined.

\*Trypan blue dye exclusion method \*\* MTT test \*\*\* MTS.

Starved = absence of serum proteins.

1. Ligresti, A.; Moriello, A.S.; Starowicz, K.; Matias, I.; Pisanti, S.; De Petrocellis, L.; Laezza, C.; Portella, G.; Bifulco, M.; Di Marzo, V. Antitumor Activity of Plant Cannabinoids with Emphasis on the Effect of Cannabidiol on Human Breast Carcinoma. *J. Pharmacol. Exp. Ther.* **2006**, *318*, 1375–1387, doi:10.1124/jpet.106.105247.
2. Sreevalsan, S.; Joseph, S.; Jutooru, I.; Chadalapaka, G.; Safe, S. Induction of apoptosis by cannabinoids in prostate and colon cancer cells is phosphatase dependent. *Anticancer. Res.* **2011**, *31*, 3799–807.
3. De Petrocellis L.; Ligresti A.; Schiano Moriello A., et al. Non-THC cannabinoids inhibit prostate carcinoma growth in vitro and in vivo: pro-apoptotic effects and underlying mechanisms. *British journal of pharmacology.* **2013**, *168*(1), 79–102.
4. Sharma, M.; Hudson, J.B.; Adomat, H.; Guns, E.S.T.; Cox, M.E. In Vitro Anticancer Activity of Plant-Derived Cannabidiol on Prostate Cancer Cell Lines. *Pharmacol. Pharm.* **2014**, *5*, 806–820, doi:10.4236/pp.2014.58091.
5. Kosgodage, U.S.; Mould, R.; Henley, A.B.; Nunn, A.V.; Guy, G.W.; Thomas, E.L.; Inal, J.M.; Bell, J.D.; Lange, S. Cannabidiol (CBD) Is a Novel Inhibitor for Exosome and Microvesicle (EMV) Release in Cancer. *Front. Pharmacol.* **2018**, *9*, 889, doi:10.3389/fphar.2018.00889.

**Table S7.** CBD's Effect on Other Cancer Types.

| Paper                  | Cell line | IC <sub>50</sub><br>(µM) | Effect on cancer<br>cells | Mechanism of Action                            | Tested<br>in cell<br>line? | Tested in<br>mouse<br>model? |
|------------------------|-----------|--------------------------|---------------------------|------------------------------------------------|----------------------------|------------------------------|
| <b>Cervical Cancer</b> |           |                          |                           |                                                |                            |                              |
| Ramer et al.           | HeLa      | ND                       | Anti-proliferative        | Dependent on CB <sub>1</sub> , CB <sub>2</sub> | Yes                        | No                           |

|                                     |                                                                         |                              |                                                                                                                                                              |                                                                                                                                                             |     |     |
|-------------------------------------|-------------------------------------------------------------------------|------------------------------|--------------------------------------------------------------------------------------------------------------------------------------------------------------|-------------------------------------------------------------------------------------------------------------------------------------------------------------|-----|-----|
| (2010) [1]                          | C33A                                                                    | *                            | Anti-invasive                                                                                                                                                | and TRPV1<br>Induces TIMP-1<br>Induces p38 and p42/44<br>MAPK activation<br>Decreases ATP<br>Increases caspase 3/7                                          |     |     |
| Lukhele et al.<br>(2016) [2]        | HeLa<br>ME-180<br>SiHa                                                  | 10.18<br>4.77<br>10.18<br>** | Anti-proliferative<br>Apoptosis<br>Changes cell<br>morphology                                                                                                | Increases expression of<br>p53 and Bax<br>Decreases expression of<br>RBBP6 and Bcl-2<br>Upregulates caspase-3<br>and -9                                     | Yes | No  |
| <b>Hepatocellular Carcinoma</b>     |                                                                         |                              |                                                                                                                                                              |                                                                                                                                                             |     |     |
| Kosgodage et al.<br>(2018) [3]      | Hep G2                                                                  | ND<br>*                      | Anti-proliferative<br>Sensitizes cells to<br>cisplatin-mediated<br>apoptosis                                                                                 | Reduces release of<br>exosomes and<br>microvesicles<br>Reduces CD63<br>expression<br>Reduces prohibitin and<br>STAT3 levels                                 | Yes | No  |
| Neumann-Raizel et al.<br>(2019) [4] | BNL1 ME<br>HEK293T                                                      | ND<br>***                    | <i>CBD</i> +<br><i>Doxorubicin</i> :<br>Increases<br>accumulation of<br>doxorubicin in<br>cells<br>Anti-proliferative<br>Increases potency<br>of doxorubicin | Facilitates entry of<br>doxorubicin through<br>TRPV2<br>Prevents doxorubicin<br>clearance through<br>inhibition of P-<br>glycoprotein ATPase<br>transporter | Yes | No  |
| <b>Thyroid Cancer</b>               |                                                                         |                              |                                                                                                                                                              |                                                                                                                                                             |     |     |
| Ligresti et al.<br>(2006) [5]       | KiMol<br>(thyroid)                                                      | 6.0 ±<br>3.0<br>****         | Anti-proliferative<br>Apoptosis<br>Cell cycle arrest<br>(G1/S)<br>Decreases tumor<br>size                                                                    | ND                                                                                                                                                          | Yes | Yes |
| <b>Renal Cell Carcinoma</b>         |                                                                         |                              |                                                                                                                                                              |                                                                                                                                                             |     |     |
| Taha et al.<br>(2019) [6]           | Renal cell<br>carcinoma<br>Non-Small<br>Cell Lung<br>Cancer<br>Melanoma | ND                           | Decreases<br>response rate of<br>nivolumab                                                                                                                   | ND                                                                                                                                                          | No  | No  |
| <b>Gastric Cancer</b>               |                                                                         |                              |                                                                                                                                                              |                                                                                                                                                             |     |     |
| Ligresti et al.<br>(2006) [5]       | AGS                                                                     | 7.5 ±<br>1.3<br>****         | Anti-proliferative                                                                                                                                           | ND                                                                                                                                                          | Yes | No  |
| Zhang et al.<br>(2019) [7]          | SGC-7901                                                                | 74.41<br>*****               | Anti-proliferative<br>Apoptosis<br>Cell cycle arrest<br>(G0-G1)                                                                                              | Inhibits CDK2 and<br>cyclin E expression<br>Increases ATM and p21<br>expression<br>Decreases p53<br>expression                                              | Yes | Yes |



|                             |                                            |         |                                                                              |                                                                                                                                                                                                                                                                                                                                                             |     |     |
|-----------------------------|--------------------------------------------|---------|------------------------------------------------------------------------------|-------------------------------------------------------------------------------------------------------------------------------------------------------------------------------------------------------------------------------------------------------------------------------------------------------------------------------------------------------------|-----|-----|
| Jeong et al. (2019) [8]     | AGS<br>MKN45<br>MKN74<br>SNU638<br>NCI-N87 | ND<br>* | Anti-proliferative<br>Apoptosis<br>Inhibits tumor growth                     | Increases cleavage of caspase-3 and -9<br>Increases cytoplasmic cytochrome c, Apaf-1, Bad, and Bax expression<br>Decreases Bcl-2 expression<br>Induces ROS<br>Increases caspase 3/7 activity<br>Mitochondrial dysfunction<br>Suppresses XIAP through the ubiquitin-proteasome system<br>Increases Smac release<br>Elevates ER stress and chaperone proteins | Yes | Yes |
| <b>Melanoma</b>             |                                            |         |                                                                              |                                                                                                                                                                                                                                                                                                                                                             |     |     |
| Simmerman et al. (2019) [9] | B16F10                                     | ND      | Increases survival time and improves quality of life<br>Reduced tumor growth | ND                                                                                                                                                                                                                                                                                                                                                          | No  | Yes |

**Pancreatic Cancer**

|                         |                                                  |    |                                                                                                                          |                                                                                                                                                             |     |     |
|-------------------------|--------------------------------------------------|----|--------------------------------------------------------------------------------------------------------------------------|-------------------------------------------------------------------------------------------------------------------------------------------------------------|-----|-----|
| Ferro et al. (2018)[10] | ASPC1<br>HPAFII<br>BXPC3<br>PANC1<br>KPC<br>mice | ND | Anti-proliferative<br>Independent of apoptosis<br>Cell cycle arrest (G1/S)<br>Increases survival time<br>Inhibits growth | Inhibition of GPR55<br>Inhibition of MEK/ERK and ERK-dependent pathways<br>Reduced expression of cyclin D1<br>Activation of tumor suppressor retinoblastoma | Yes | Yes |
|-------------------------|--------------------------------------------------|----|--------------------------------------------------------------------------------------------------------------------------|-------------------------------------------------------------------------------------------------------------------------------------------------------------|-----|-----|

ND: Not determined.

\* WST-1 test \*\*MTT assay \*\*\*CellTiter-Fluor Cell Viability Assay \*\*\*\*Crystal violet vital staining \*\*\*\*\* CCK-8 assay.

Smac: second mitochondria-derived activator of caspase.

XIAP: X-linked inhibitor of apoptosis.

MMP: mitochondrial membrane potential.

1. Ramer, R.; Merkord, J.; Rohde, H.; Hinz, B. Cannabidiol inhibits cancer cell invasion via upregulation of tissue inhibitor of matrix metalloproteinases-1. *Biochem. Pharmacol.* **2010**, *79*, 955–966, doi:10.1016/j.bcp.2009.11.007.
2. Lukhele, S.T.; Motadi, L.R. Cannabidiol rather than Cannabis sativa extracts inhibit cell growth and induce apoptosis in cervical cancer cells. *BMC Complement. Altern. Med.* **2016**, *16*, 335, doi:10.1186/s12906-016-1280-0.

3. Kosgodage, U.S.; Mould, R.; Henley, A.B.; Nunn, A.V.; Guy, G.W.; Thomas, E.L.; Inal, J.M.; Bell, J.D.; Lange, S. Cannabidiol (CBD) Is a Novel Inhibitor for Exosome and Microvesicle (EMV) Release in Cancer. *Front. Pharmacol.* **2018**, *9*, 889, doi:10.3389/fphar.2018.00889.
4. Neumann-Raizel H.; Shilo A.; Lev S., et al. 2-APB and CBD-mediated targeting of charged cytotoxic compounds into tumor-like cells suggests the involvement of TRPV2 channels. *Frontiers in pharmacology.* **2019**, *10*, 1198.
5. Ligresti, A.; Moriello, A.S.; Starowicz, K.; Matias, I.; Pisanti, S.; De Petrocellis, L.; Laezza, C.; Portella, G.; Bifulco, M.; Di Marzo, V. Antitumor Activity of Plant Cannabinoids with Emphasis on the Effect of Cannabidiol on Human Breast Carcinoma. *J. Pharmacol. Exp. Ther.* **2006**, *318*, 1375–1387, doi:10.1124/jpet.106.105247.
6. Taha, T.; Meiri, D.; Talhamy, S.; Wollner, M.; Peer, A.; Bar-Sela, G. Cannabis Impacts Tumor Response Rate to Nivolumab in Patients with Advanced Malignancies. *Oncol.* **2019**, *24*, 549–554, doi:10.1634/theoncologist.2018-0383.
7. Zhang, X.; Qin, Y.; Pan, Z.; Li, M.; Liu, X.; Chen, X.; Qu, G.; Zhou, L.; Xu, M.; Zheng, Q.; et al. Cannabidiol Induces Cell Cycle Arrest and Cell Apoptosis in Human Gastric Cancer SGC-7901 Cells. *Biomol.* **2019**, *9*, 302, doi:10.3390/biom9080302.
8. Jeong, S.; Jo, M.J.; Yun, H.K.; Kim, D.Y.; Kim, B.R.; Kim, J.L.; Park, S.H.; Na, Y.J.; A Jeong, Y.; Kim, B.G.; et al. Cannabidiol promotes apoptosis via regulation of XIAP/Smac in gastric cancer. *Cell Death Dis.* **2019**, *10*, 1–13, doi:10.1038/s41419-019-2001-7.
9. Simmerman, E.; Qin, X.; Yu, J.C.; Baban, B. Cannabinoids as a Potential New and Novel Treatment for Melanoma: A Pilot Study in a Murine Model. *J. Surg. Res.* **2019**, *235*, 210–215, doi:10.1016/j.jss.2018.08.055.
10. Ferro, R.; Adamska, A.; Lattanzio, R.; Mavrommati, I.; Edling, C.E.; Arifin, S.A.; Fyffe, C.A.; Sala, G.; Sacchetto, L.; Chiorino, G.; et al. GPR55 signalling promotes proliferation of pancreatic cancer cells and tumour growth in mice, and its inhibition increases effects of gemcitabine. *Oncogene* **2018**, *37*, 6368–6382, doi:10.1038/s41388-018-0390-1.
